# Supplementary material for: A Setaria-inflorescence-structured catalyst based on nickel–cobalt wrapped silver nanowire conductive networks for highly efficient hydrogen evolution
Source: Royal Society of Chemistry journal article supplement (doi:10.1039/c9ta10413e), 2019-01-01
Supplement: c9ta10413e1.pdf [file c9ta10413e1.pdf]

Electronic Supplementary Material (ESI) for Journal of Materials Chemistry A.

## Electronic Supplementary Information

### **Setaria-Inflorescence-Structured Catalyst Based on Nickel-Cobalt Wrapped Silver Nanowire Conductive Networks for Highly Efficient Hydrogen Evolution**

Kailing Zhou,<sup>a</sup> Qianqian Zhang,<sup>\*a</sup> Zelin Wang,<sup>b</sup> Changhao Wang,<sup>a</sup> Changbao Han,<sup>a</sup> Xiaoxing Ke,<sup>b</sup> Zilong Zheng,<sup>a</sup> Hao Wang,<sup>\*a</sup> Jingbing Liu<sup>a</sup> and Hui Yan<sup>a</sup>

<sup>a</sup> College of Materials Science and Engineering, Beijing University of Technology, Beijing 100124, P. R. China. E-mail: zhangqianqian@bjut.edu.cn; haowang@bjut.edu.cn

<sup>b</sup> Institute of Microstructure and Properties of Advanced Materials, Beijing University of Technology, Beijing 100124, P. R. China.

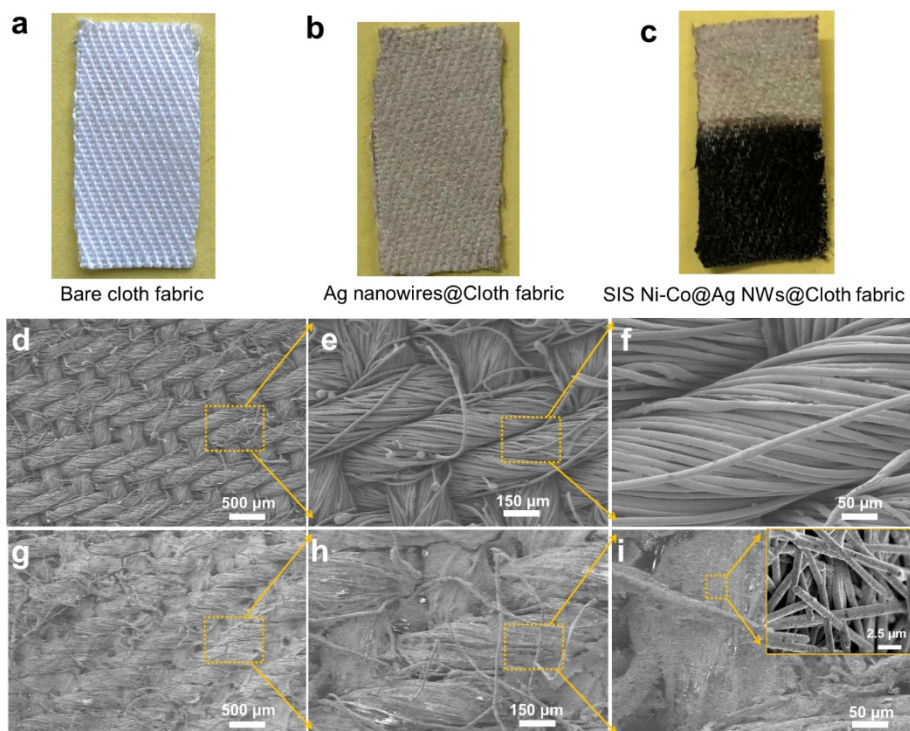

**Figure S1.** The the digital images of a) bare carbon fabric, b) the Ag nanowires supported on cloth fabric and c) the as-prepared SIS Ni-Co@Ag nanowires network on cloth fabric. The different-magnification SEM images of d-f) bare cloth fabric substrate and g-i) The fabricated SIS Ni-Co@Ag nanowires on cloth fabric substrate.



potential (-1.2 V vs SCE) in an aqueous solution (Step (3)).<sup>2</sup> The hydrogen evolution will serve as a dynamic template for fabricating nanochannels Ni-Co layer.<sup>3</sup>

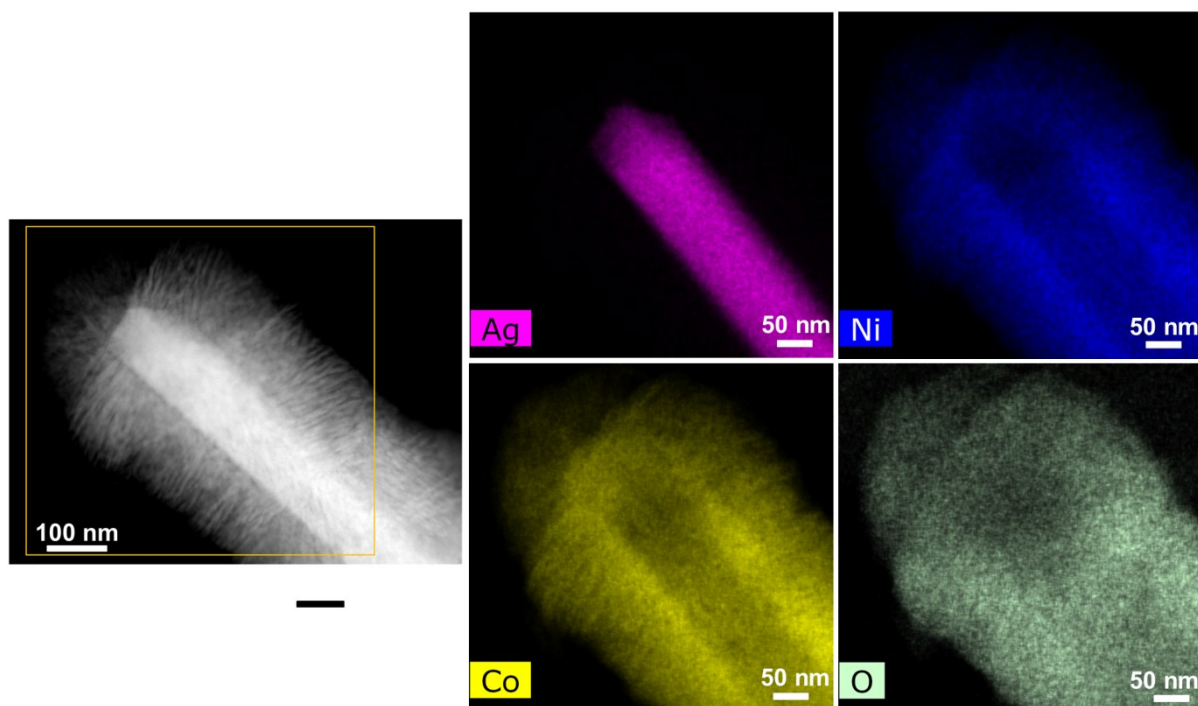

**Figure S3.** The HAADF-STEM image and the corresponding element distribution images in the selected yellow squares..

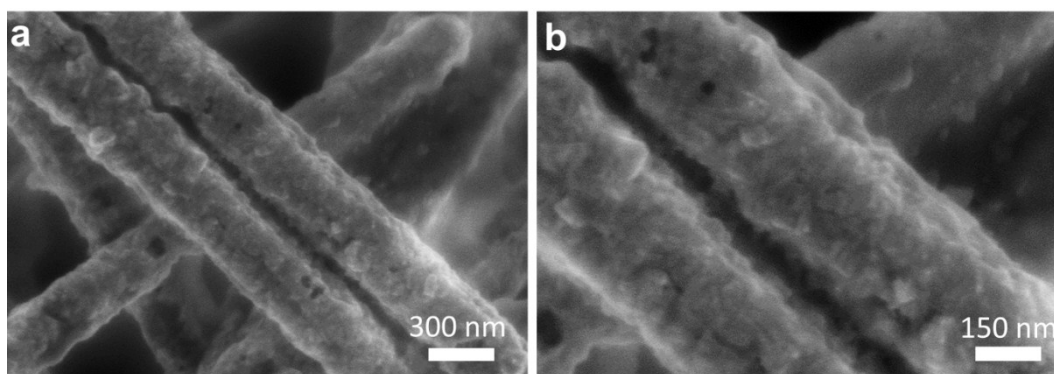

**Figure S4.** The high-magnification SEM images of Ni-Co@Ag NWs with different magnifications.

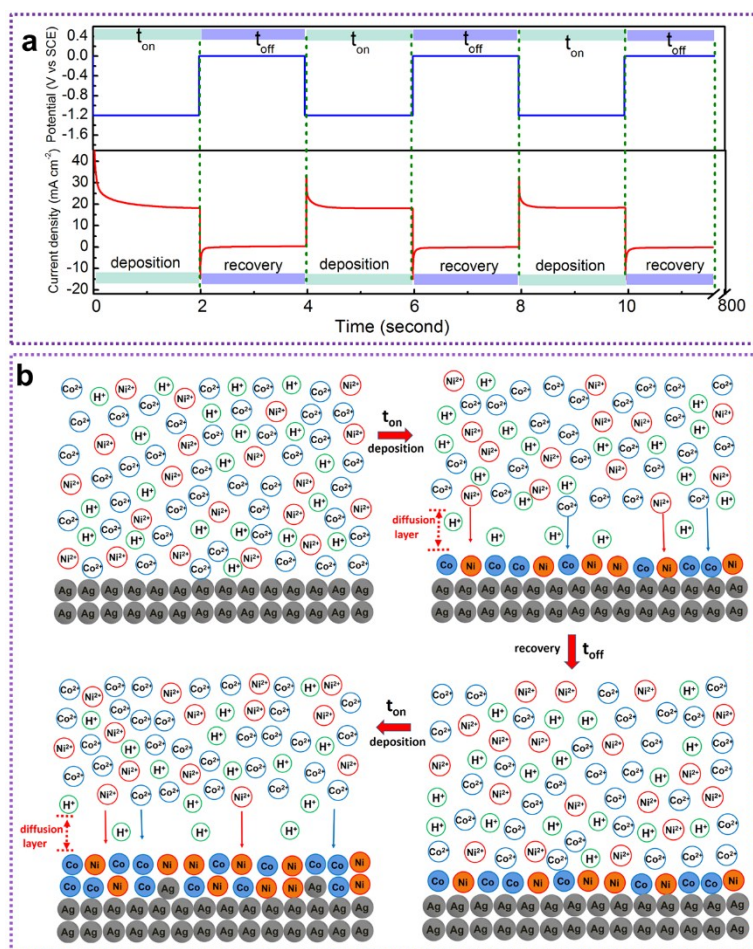

**Figure S5.** a) The pulsed potential electrodeposition model and b) the simplified electrochemical reaction mechanism for fabricating Ni-Co@Ag NWs.

In another aspect, the effect of hydrogen evolution can be minimized or avoided if the metal ions near deposition interfaces are being supplied sufficiently during the process of deposition. Here, pulsed potential electrodeposition model instead of potentiostatic electrodeposition model is used for depositing compact Ni-Co layer on Ag NWs (Figure S5a), in which a periodic potential delay process ( $t_{\text{off}}$ ) is inserted between two successive deposition pulses. The sufficient  $t_{\text{off}}$  will allow the depleted metal ions near the deposition interface to be supplied sufficiently (Figure S5b), and the concentration of  $\text{Co}^{2+}$  and  $\text{Ni}^{2+}$  metal ions near deposition interfaces will recover before the next deposition pulse starts (Step (2)).<sup>4, 5</sup> Enough metal ions participating in the next deposition reaction will efficiently limit hydrogen evolution reaction (Step (3)).<sup>1</sup> In this case, the Ni-Co@Ag nanowires with a compact Ni-Co layer on Ag NWs are fabricated.

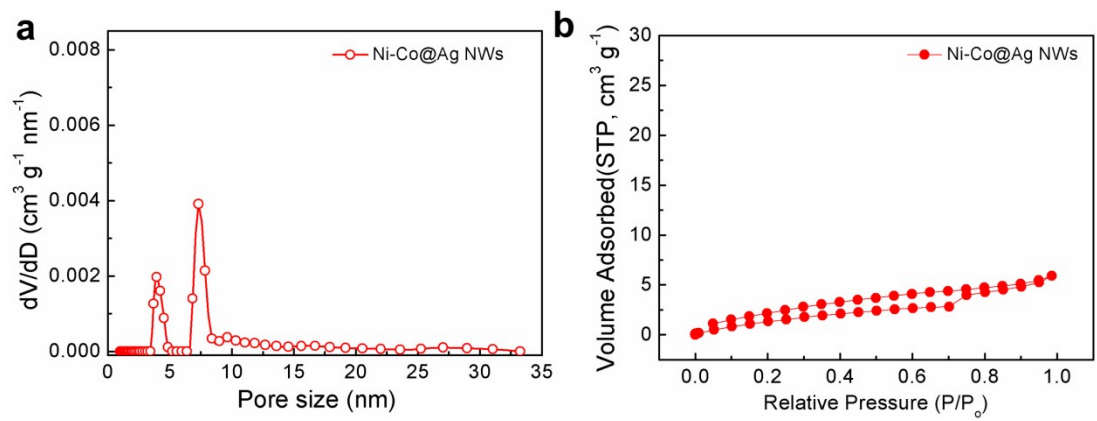

**Figure S6.** a) The pore-size distributions curves and b) the  $\text{N}_2$  adsorption-desorption isotherms curves of Ni-Co@Ag NWs electrode.



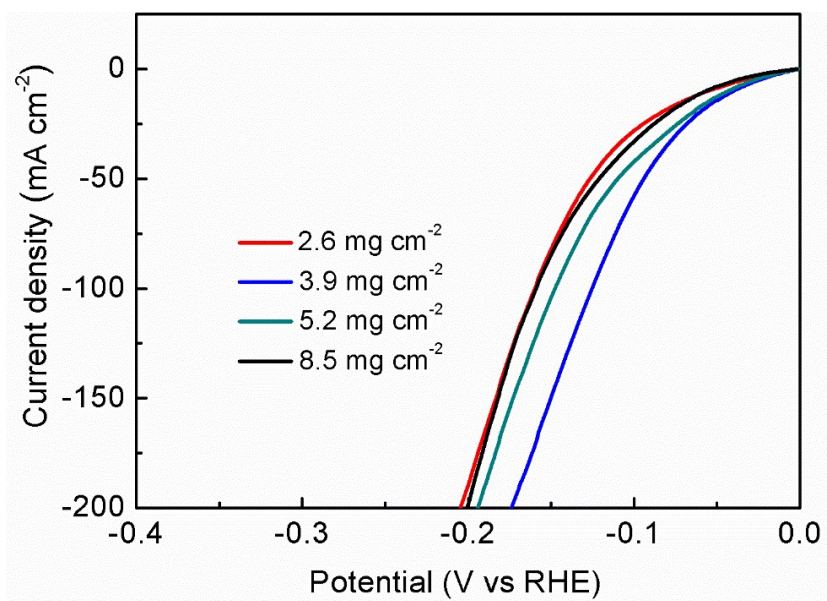

**Figure S7.** Polarization curves of the SIS Ni-Co@Ag NWs with the different mass loading on cloth fabric substrate for HER.

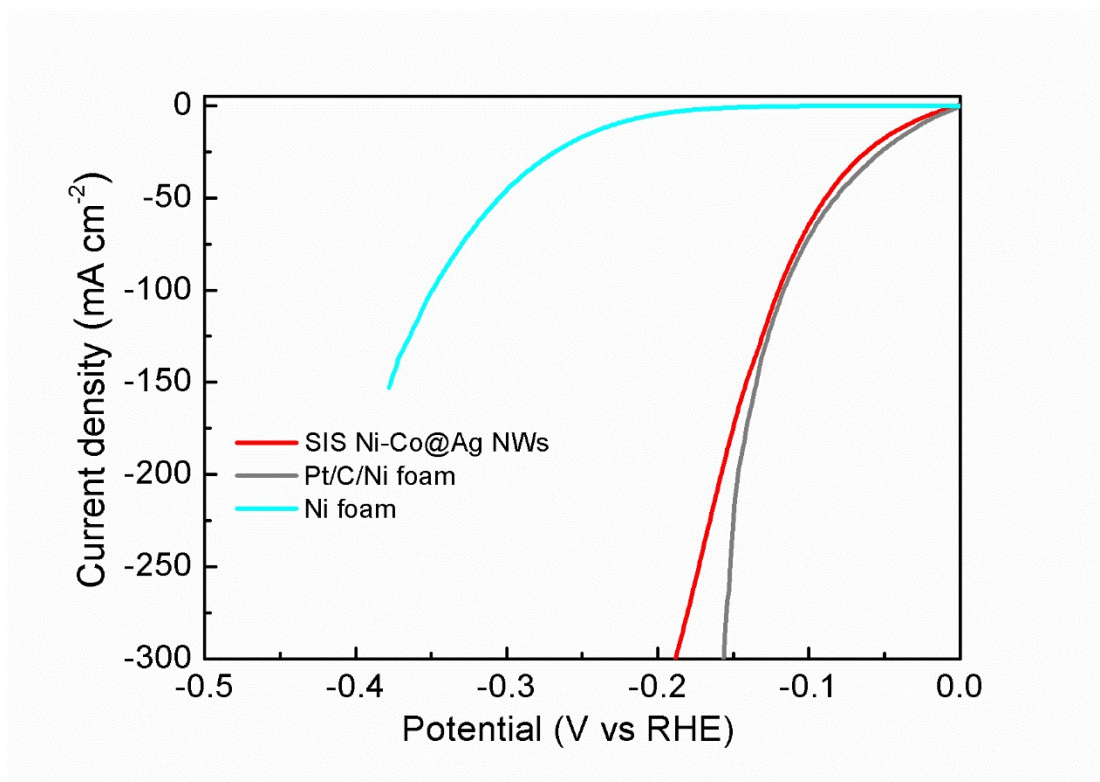

**Figure S8.** The polarization curves of SIS Ni-Co@Ag NWs for HER in contrast with that of Pt/C and Ni foam.

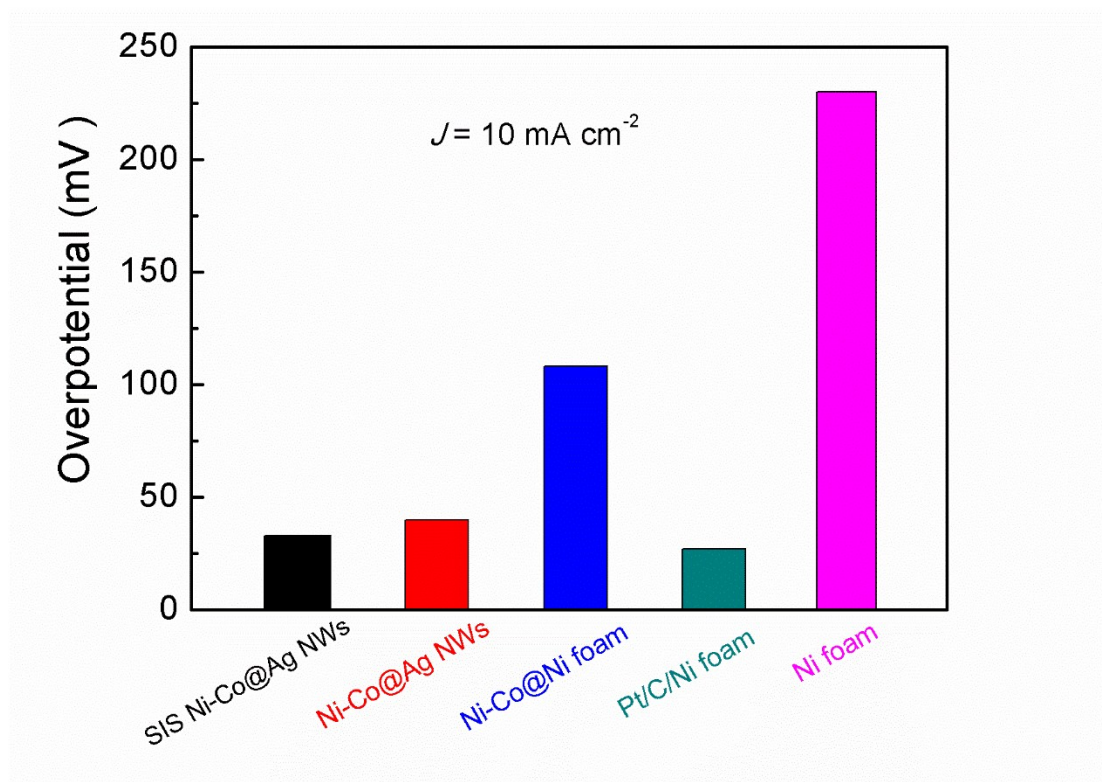

**Figure S9.** The overpotentials of different catalysts required to deliver a current density of  $J = 10 \text{ mA cm}^{-2}$ .

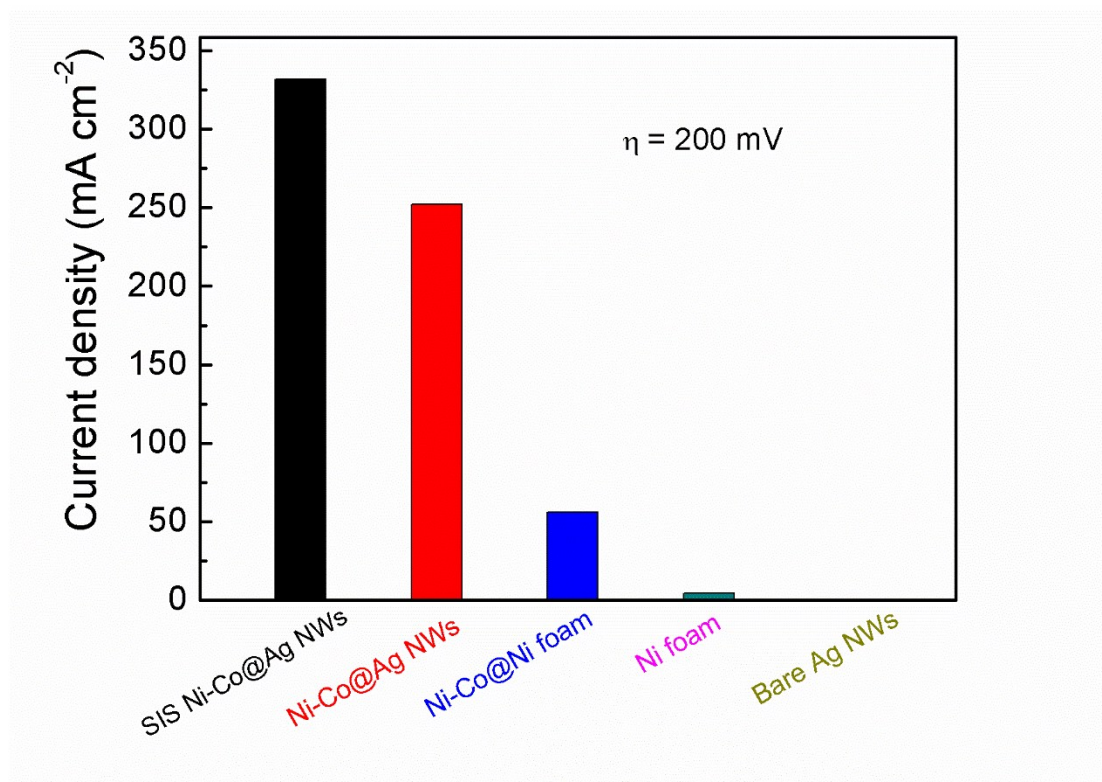

**Figure S10.** The corresponding current density of different catalysts at the overpotential of  $\eta = 200$  mV.

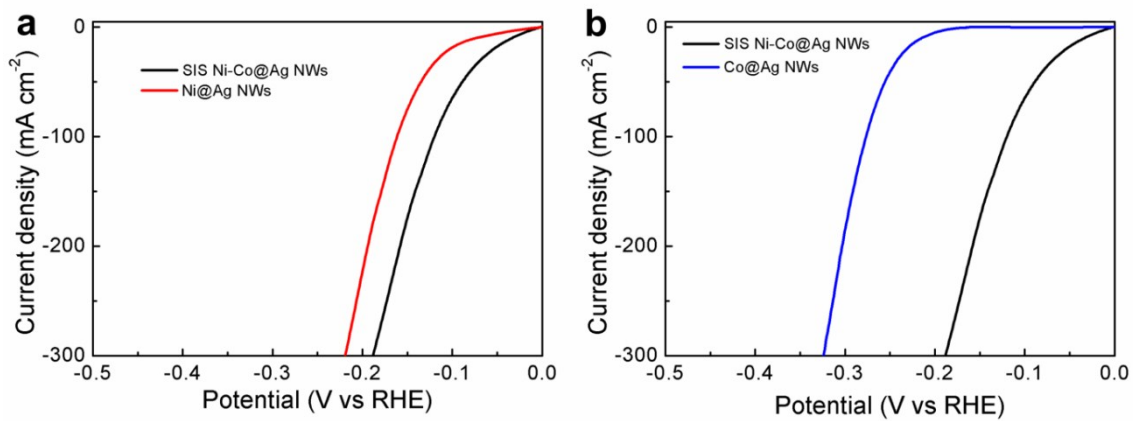

**Figure S11.** The polarization curves of SIS Ni-Co@Ag NWs in contrast with that of a) Ni@Ag NWs and b) Co@Ag NWs catalyst, respectively.

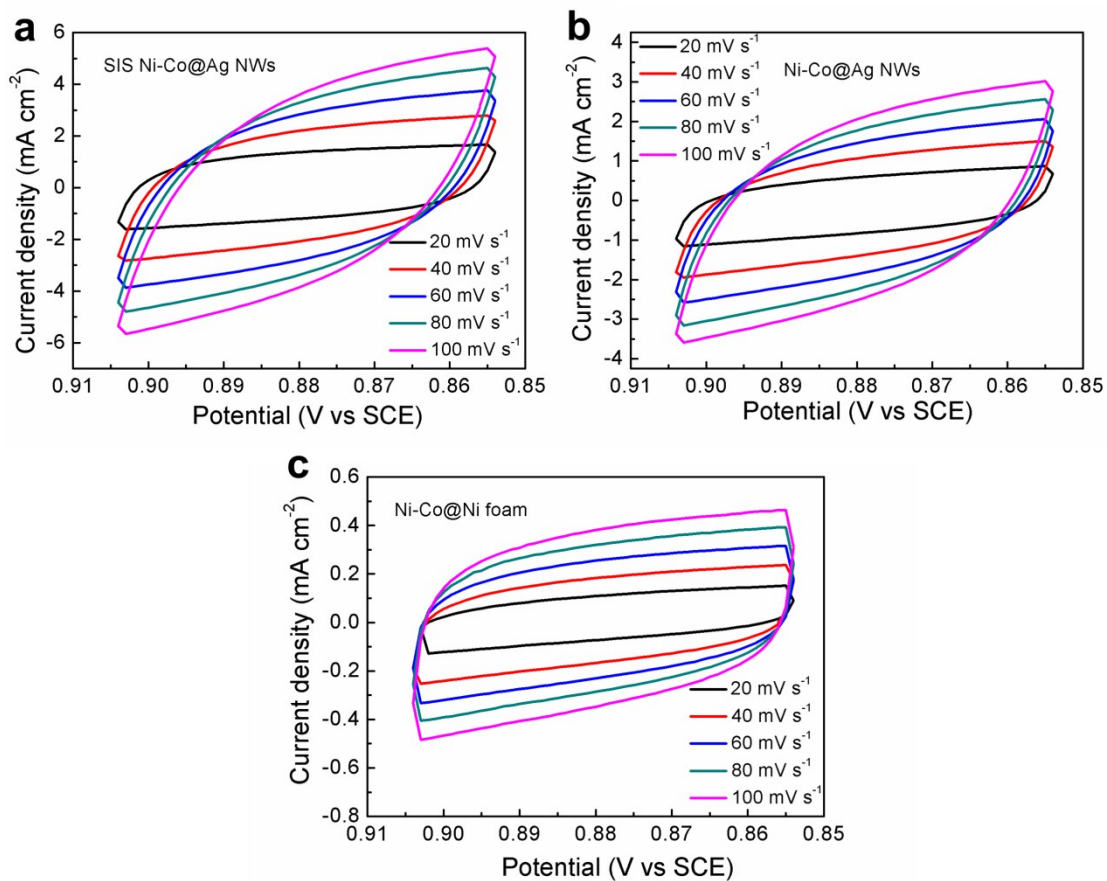

**Figure S12.** Cyclic voltammograms curves with different scan rates for electrochemical capacitance measurements of a) SIS Ni-Co@Ag NWs, b) Ni-Co@Ag NWs, c) Ni-Co@Ni foam electrodes.

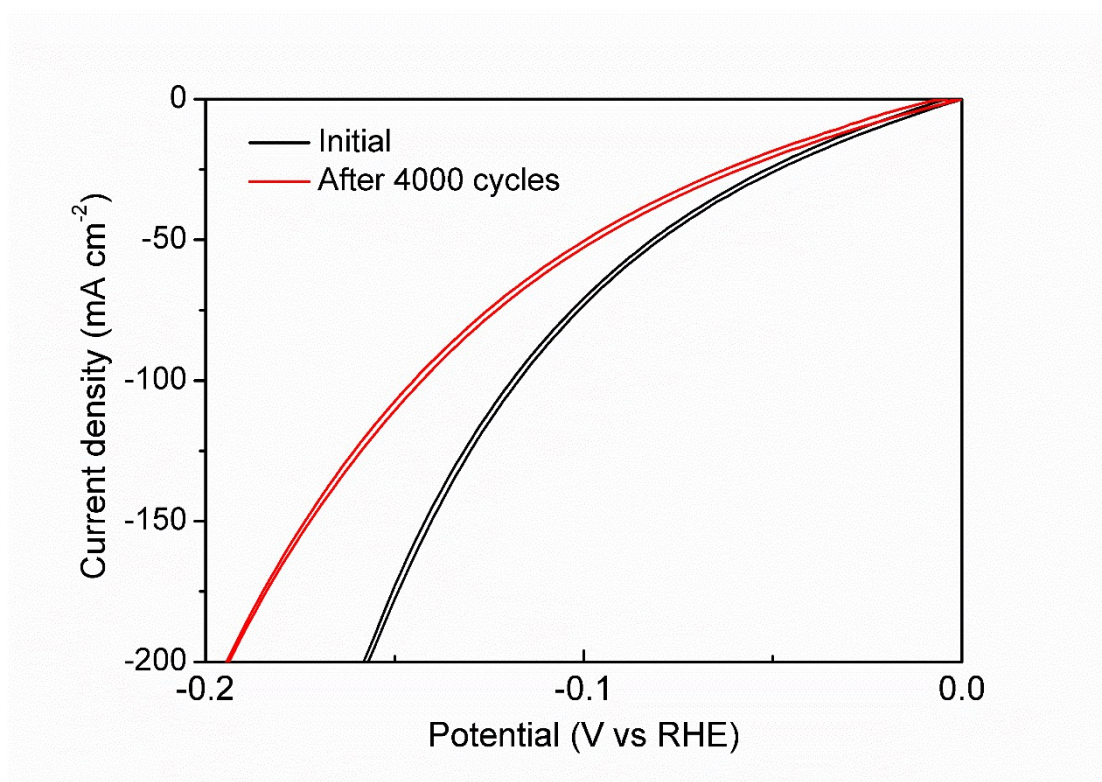

**Figure S13.** The CV LSV curves of SIS Ni-Co@Ag NWs at the initial and after 4000 CV cycles for HER recorded at forward scan and return scan, indicating little effect from the hysteresis.

**Table S1.** The elements distribution from EDS analysis for the bulk of SIS Ni-Co@Ag NWs catalyst and the elements proportion on the surface of catalyst quantified by the XPS survey.

| Atomic Concentration (%)              | Ag    | Co    | Ni    | O     |
|---------------------------------------|-------|-------|-------|-------|
| EDS analysis for the bulk of catalyst | 13.13 | 47.43 | 37.58 | 1.86  |
| XPS survey on the surface of catalyst | 0.12  | 17.90 | 7.75  | 74.23 |



**Table S2.** BET surface area, pore volume, and average pore size of the SIS Ni-Co@Ag NWs and Ni-Co@Ag NWs samples.

| Sample           | BET surface area<br>(m <sup>2</sup> g <sup>-1</sup> ) | Pore volume<br>(cm <sup>3</sup> g <sup>-1</sup> ) | Average pore<br>size<br>(nm) |
|------------------|-------------------------------------------------------|---------------------------------------------------|------------------------------|
| SIS Ni-Co@Ag NWs | 24.587                                                | 0.042                                             | 5.572                        |
| Ni-Co@Ag NWs     | 4.435                                                 | 0.009                                             | 6.083                        |

**Table S3.** Performances comparison of SIS Ni-Co@Ag NWs with reported Ni-Co oxide-based catalysts for HER.

| Electrocatalysts                                                                 | Overpotential at 10 mA cm <sup>-2</sup> (mV) | Tafel slop (mV dec <sup>-1</sup> ) | Reference                                                    |
|----------------------------------------------------------------------------------|----------------------------------------------|------------------------------------|--------------------------------------------------------------|
| SIS Ni-Co@Ag NWs                                                                 | 33                                           | 29                                 | This work                                                    |
| NiCo <sub>2</sub> O <sub>4</sub> holey nanosheets                                | 260                                          | 127                                | <i>J. Am. Chem. Soc.</i> <b>2018</b> , 140, 5241.            |
| NiCo <sub>2</sub> P <sub>x</sub> nanowires                                       | 58                                           | 34                                 | <i>Adv. Mater.</i> <b>2017</b> , 29, 1605502.                |
| NiCo <sub>2</sub> S <sub>4</sub> nanowire                                        | 210                                          | 59                                 | <i>Adv. Funct. Mater.</i> <b>2016</b> , 26, 4661.            |
| N-NiCo <sub>2</sub> S <sub>4</sub> nanowire                                      | 41                                           | 37                                 | <i>Nat. Commun.</i> <b>2018</b> , 9, 1425.                   |
| Ni-Co-P hollow nanobricks                                                        | 107                                          | 46                                 | <i>Energy Environ. Sci.</i> <b>2018</b> , 11, 872.           |
| Ni <sub>0.33</sub> Co <sub>0.67</sub> Se <sub>2</sub>                            | 106                                          | 60                                 | <i>Adv. Energy Mater.</i> <b>2017</b> , 7, 1602089           |
| Ni <sub>1-x</sub> Co <sub>x</sub> Se <sub>2</sub> nanosheet                      | 85                                           | 52                                 | <i>Adv. Mater.</i> <b>2017</b> , 29, 1606521.                |
| NiCo <sub>2</sub> O <sub>4</sub> hollow microcuboids                             | 110                                          | 50                                 | <i>Angew. Chem.</i> <b>2016</b> , 128, 6398.                 |
| NiCo/NiCoO <sub>x</sub> heteronanostructures                                     | 155                                          | 35                                 | <i>ACS Appl. Mater. Interfaces</i> , <b>2016</b> , 8, 3208.  |
| NiCoO <sub>2</sub> @C microflakes arrays                                         | 128                                          | 61                                 | <i>Electrochim. Acta</i> <b>2018</b> , 284, 226.             |
| NiCo-NiCoO <sub>2</sub> @NC                                                      | 94                                           | 125                                | <i>J. Mater. Chem. A</i> <b>2017</b> , 5, 15901.             |
| NiCo <sub>2</sub> O <sub>4</sub> @NiO@Ni Core/Shell nanocone array               | 120                                          | 58                                 | <i>Part. Part. Syst. Charact.</i> <b>2017</b> , 34, 1700228. |
| Self-supported NiCoO <sub>2</sub> nanowires                                      | 101                                          | 42                                 | <i>Nanoscale</i> , <b>2018</b> , 10, 18767.                  |
| Ni/Co mixed oxide nanocrystals                                                   | 236                                          | —                                  | <i>Adv. Funct. Mater.</i> <b>2017</b> , 27, 1605121.         |
| CFP/NiCo <sub>2</sub> O <sub>4</sub> /CuS                                        | 72                                           | 41                                 | <i>Adv. Funct. Mater.</i> <b>2015</b> , 25, 6814.            |
| CFP/NiCo <sub>2</sub> O <sub>4</sub> /Co <sub>0.57</sub> Ni <sub>0.43</sub> LMOs | 52                                           | 34                                 | <i>Nanoscale</i> <b>2016</b> , 8, 1390.                      |

**Table S4.** Comparison of HER performances for SIS Ni-Co@Ag NWs with other reported nanowires based, bi- and tri-metal based electrocatalysts as well as others representative HER catalysts.

|                                      | Electrocatalysts                                          | Overpotential<br>at 10 mA cm <sup>-2</sup><br>(mV) | Tafel slop<br>(mV<br>dec <sup>-1</sup> ) | Reference                                                     |
|--------------------------------------|-----------------------------------------------------------|----------------------------------------------------|------------------------------------------|---------------------------------------------------------------|
|                                      | SIS Ni-Co@Ag<br>NWs                                       | 33                                                 | 29                                       | This work                                                     |
|                                      | CoP<br>nanowire/CC                                        | 209                                                | 129                                      | <i>J. Am. Chem. Soc.</i><br><b>2014</b> , 136, 7587.          |
| Nanowire-based<br>HER<br>catalysts   | FeP nanowire                                              | 194                                                | 75                                       | <i>Chem. Commun.</i><br><b>2016</b> , 52, 2819.               |
|                                      | Pt <sub>3</sub> Ni <sub>2</sub> -NWs-S/C                  | 42                                                 | —                                        | <i>Nat. Commun.</i><br><b>2017</b> , 8, 14580.                |
|                                      | Cu nanowires<br>@NiFe LDH                                 | 116                                                | 59                                       | <i>Energy Environ.<br/>Sci.</i> <b>2017</b> , 10, 1820.       |
|                                      | MoS <sub>2</sub> (1-x)Se <sub>2x</sub> /NiSe <sub>2</sub> | 69                                                 | 42                                       | <i>Nat. Commun.</i><br><b>2016</b> ,<br>7, 12765.             |
| Bimetal<br>based<br>HER<br>catalysts | CoMoP@C                                                   | 81                                                 | 55                                       | <i>Energy Environ.<br/>Sci.</i><br><b>2017</b> , 10, 788.     |
|                                      | NiMo <sub>3</sub> S <sub>4</sub>                          | 257                                                | 98                                       | <i>Angew. Chem. Int.<br/>Ed.</i><br><b>2016</b> , 55, 15240.  |
|                                      | NiFe LDH/NF                                               | 210                                                | —                                        | <i>Science</i> <b>2014</b> , 345,<br>1593.                    |
|                                      | Ni(OH) <sub>2</sub> / Pt-<br>islands/ Pt(111)             | 138                                                | —                                        | <i>Science</i> <b>2011</b> , 334,<br>1256                     |
| Other<br>typical<br>HER<br>catalysts | NiO/Ni-CNT                                                | 80                                                 | 51                                       | <i>Nat. Commun.</i><br><b>2014</b> , 5: 4695.                 |
|                                      | CoS <sub>2</sub> /RGO-<br>CNT                             | 142                                                | 51                                       | <i>Angew. Chem. Int.<br/>Ed.</i><br><b>2014</b> , 126, 12802. |
|                                      | Pt-Ni multipods                                           | 65                                                 | 74                                       | <i>Nat. Commun.</i><br><b>2017</b> , 8, 15131.                |

**Table S5.** The adsorption enthalpies of hydrogen and water molecule on 5 considered sites A, B, C, D and E of NiCo/NiCoO and NiCo/NiCoO@Ag electrodes.

| H Adsorption Enthalpy (eV) | Ni      | Co      | Hollow  | O       | Co-hollow |
|----------------------------|---------|---------|---------|---------|-----------|
| Site                       | A       | B       | C       | D       | E         |
| NiCo/NiCoO                 | -0.3025 | -0.5645 | -0.5855 | -0.1015 | -0.9525   |
| NiCo/NiCoO@Ag              | -0.5235 | -0.2965 | -0.4625 | -0.0655 | -0.8435   |

  

| H <sub>2</sub> O Adsorption Enthalpy (eV) | Ni     | Co     | Hollow | O      | Co-hollow |
|-------------------------------------------|--------|--------|--------|--------|-----------|
| Site                                      | A      | B      | C      | D      | E         |
| NiCo/NiCoO                                | -0.108 | -0.412 | -0.576 | -0.373 | -0.041    |
| NiCo/NiCoO@Ag                             | -0.141 | -0.488 | -0.726 | -0.383 | 0.061     |

## References

1. K. Nielsch, F. Müller, A. P. Li and U. Gösele, *Adv. Mater.*, 2000, **12**, 582.
2. P.-C. Hsu, S.-K. Seol, T.-N. Lo, C.-J. Liu, C.-L. Wang, C.-S. Lin, Y. Hwu, C. H. Chen, L.-W. Chang, J. H. Je and G. Margaritondo, *J. Electrochem. Soc.*, 2008, **155**, D400.
3. H. C. S. And and M. Liu, *Chem. Mater.*, 2004, **16**, 5460.
4. A. R. Despic and K. I. Popov, *J. Appl. Electrochem.*, 1971, **1**, 275.
5. H. Natter, M. Schmelzer and R. Hempelmann, *J. Mater. Res.*, 1998, **13**, 1186.
